# Supplementary material for: Carotid Plaque Vulnerability Diagnosis by CTA versus MRA: A Systematic Review
Source: MDPI journal article supplement (doi:10.3390/diagnostics13040646), 2023-02-09
Supplement: s1 [file s1]

Supplementary Table S2. Search Strategy

Comparative studies on humans, English Studies, RCT and Observational studies

Subject Area: Medicine

Time Period: Inception-2022

Exclusion criteria: 1. Case reports 2. Case Series 3. Studies reporting solely on one or the other method of imaging 4. Non-comparable studies 5. Reviews

|                     |                                                                                                                                                                                                                                                                                                                                                                                                                                                                                                                                                                                                                                                                                                                                                                                                                                                                                                                                                                                                                                                                                                                                                                                                                                          |
|---------------------|------------------------------------------------------------------------------------------------------------------------------------------------------------------------------------------------------------------------------------------------------------------------------------------------------------------------------------------------------------------------------------------------------------------------------------------------------------------------------------------------------------------------------------------------------------------------------------------------------------------------------------------------------------------------------------------------------------------------------------------------------------------------------------------------------------------------------------------------------------------------------------------------------------------------------------------------------------------------------------------------------------------------------------------------------------------------------------------------------------------------------------------------------------------------------------------------------------------------------------------|
| PUBMED (HITS: 2512) | ((((((stroke) OR (stroke[MeSH Terms]))<br>OR ((TIA) OR (TIA[MeSH Terms])))<br>OR ((transient ischemic attack) OR<br>(transient ischemic attack[MeSH<br>Terms]))) OR ((amaurosis fugax) OR<br>(amaurosis fugax[MeSH Terms])))<br>AND (((computed tomography<br>angiography) OR (computed<br>tomography angiography[MeSH<br>Terms])) OR ((magnetic resonance<br>angiography) OR (magnetic resonance<br>angiography[MeSH Terms]))) AND<br>((((((((intraplaque hemorrhage) OR<br>(intraplaque hemorrhage[MeSH<br>Terms])) OR (IPH)) OR (IPH[MeSH<br>Terms])) OR (((lipid-rich necrotic core)<br>OR (lipid-rich necrotic core[MeSH<br>Terms])) OR (LRNC)) OR<br>(LRNC[MeSH Terms])) OR<br>(((Neovascularization) OR<br>(Neovascularization[MeSH Terms]))<br>OR (Neovascularisation)) OR<br>(Neovascularisation[MeSH Terms]))<br>OR ((Inflammation) OR<br>(Inflammation[MeSH Terms])) OR<br>((Ulceration) OR (Ulceration[MeSH<br>Terms])) OR ((calcification) OR<br>(calcification[MeSH Terms])) OR<br>((thrombus) OR (thrombus[MeSH<br>Terms])) OR (((thin-fibrous cap) OR<br>(thin-fibrous cap[MeSH Terms])) OR<br>(TFC)) OR (TFC[MeSH Terms])) OR<br>((carotid plaque vulnerability) OR<br>(carotid plaque vulnerability[MeSH<br>Terms])))) |
| SCOPUS (HITS: 663)  | "stroke" OR "transient ischemic<br>attack" OR "amaurosis<br>fugax" ) AND ( "computed<br>tomography<br>angiography" OR "magnetic resonance<br>angiography" ) AND ( "intraplaque<br>hemorrhage" OR "lipid-rich necrotid<br>core" OR "carotid plaque<br>neovascularization" OR "carotid plaque                                                                                                                                                                                                                                                                                                                                                                                                                                                                                                                                                                                                                                                                                                                                                                                                                                                                                                                                              |

|                    |                                                                                                                                                                                                                                                                                                                                                                                                                                                                                                                                                                                                                                                                                                                                                                                                                                                                                                                                                                    |
|--------------------|--------------------------------------------------------------------------------------------------------------------------------------------------------------------------------------------------------------------------------------------------------------------------------------------------------------------------------------------------------------------------------------------------------------------------------------------------------------------------------------------------------------------------------------------------------------------------------------------------------------------------------------------------------------------------------------------------------------------------------------------------------------------------------------------------------------------------------------------------------------------------------------------------------------------------------------------------------------------|
|                    | neovascularisation" OR "carotid plaque inflammation" OR "carotid plaque ulceration" OR "carotid plaque calcification" OR "carotid plaque thrombus" OR "thin fibrous cap" OR "carotid plaque vulnerability"                                                                                                                                                                                                                                                                                                                                                                                                                                                                                                                                                                                                                                                                                                                                                         |
| CENTRAL(HITS: 127) | #1 stroke<br>#2 [mh "stroke"]<br>#3 transient ischemic attack<br>#4 [mh "transient ischemic attack"]<br>#5 amaurosis fugax<br>#6 [mh "amaurosis fugax"]<br>#7 TIA<br>#8 [mh "TIA"]<br>#9 computed tomography angiography<br>#10 [mh "computed tomography angiography"]<br>#11 magnetic resonance angiography<br>#12 [mh "magnetic resonance angiography"]<br>#13 intraplaque hemorrhage<br>#14 [mh "intraplaque hemorrhage"]<br>#15 lipid rich necrotic core<br>#16 [mh "lipid rich necrotic core"]<br>#17 neovascularization<br>#18 [mh "neovascularization"]<br>#19 neovascularization<br>#20 [mh "neovascularisation"]<br>#21 inflammation<br>#22 [mh "inflammation"]<br>#23 calcification<br>#24 [mh "calcification"]<br>#25 ulceration<br>#26 [mh "ulceration"]<br>#27 thrombus<br>#28 [mh "thrombus"]<br>#29 vulnerable carotid plaque<br>#30 [mh "vulnerable carotid plaque"]<br>#31 {OR #1-#8}<br>#32 {OR #9-#12}<br>#33 {OR #13-#30}<br>#34 {AND #31-#33} |

Total Hits: 3302

Duplicate Screening: 3128

Automatic Tool Duplicate Removal: 135

By Hand Duplicate Removal: 39

Title-Abstract Screening: 51

Data Overlap Screening: 51  
Full-Text Screening: 5
