# Supplementary material for: Carotid Plaque Vulnerability Diagnosis by CTA versus MRA: A Systematic Review
Source: MDPI journal article supplement (doi:10.3390/diagnostics13040646), 2023-02-09
Supplement: s1 [file s1]

**Supplementary Table S1. PICO Model**

|   |                                              |                                                                                                                                                                         |
|---|----------------------------------------------|-------------------------------------------------------------------------------------------------------------------------------------------------------------------------|
| P | Patient, population or problem               | Patients with symptomatic (stroke, TIA, amaurosis fugax) or asymptomatic carotid artery stenosis                                                                        |
| I | Intervention, prognostic factor or exposure  | Carotid arteries' characteristics detected in CTA                                                                                                                       |
| C | Comparison of intervention                   | Carotid arteries' characteristics detected in MRA                                                                                                                       |
| O | Outcome you would like to measure or achieve | Carotid plaque vulnerability, including IPH, LRNC, TFC, plaque neovascularization, inflammation, ulceration, calcification, or thrombus                                 |
|   | What type of question are you asking?        | Does CTA presented similar accuracy with MRA (reference study) for the detection of carotid plaque vulnerable characteristics in symptomatic and asymptomatic patients? |
|   | Type of study you want to find               | Observational studies (Randomized, Non-randomized)                                                                                                                      |

Footnote: P.I.C.O. (patient; intervention; comparison; outcome) model was used to define the clinical questions and clinically relevant evidence in the literature, TIA; Transient Ischemic Attack, CTA; Computed tomography angiography, MRA; Magnetic resonance angiography, IPH; Intra-plaque hemorrhage, LRNC; Lipid-rich necrotic core, TFC; Thin fibrous cap
